# Supplementary material for: Isolation and Polyphasic Characterization of Desulfuromonas versatilis sp. Nov., an Electrogenic Bacteria Capable of Versatile Metabolism Isolated from a Graphene Oxide-Reducing Enrichment Culture
Source: Microorganisms. 2021 Sep 14;9(9):1953. doi: 10.3390/microorganisms9091953 (PMC8465243; doi:10.3390/microorganisms9091953)
Supplement: Supplementary file 1 [file microorganisms-09-01953-s001.zip › microorganisms-1314475-supplementary.pdf]

## Supplemental material

Isolation and polyphasic characterization of ‘*Desulfuromonas versatilis*’ sp. nov., an electrogenic bacteria capable of versatile metabolism isolated from a graphene oxide-reducing enrichment culture

Li Xie<sup>1,†</sup>, Naoko Yoshida<sup>1,\*†</sup>, Shun’ichi Ishi<sup>2</sup>, Lingyu Meng<sup>1</sup>

<sup>1</sup>Department of Civil Engineering, Nagoya Institute of Technology (Nitech), Nagoya, Japan

<sup>2</sup> Institute for Extra-cutting-edge Science and Technology Avant-garde Research (X-star), Japan Agency for Marine-Earth Science and Technology (JAMSTEC), Yokosuka, Japan

\*Correspondence: yoshida.naoko@nitech.ac.jp; Tel.: +81-527-355-437

<sup>†</sup>These authors have contributed equally to this work and share first authorship

**Table S1 Genes uniquely present in strain T3 compared with other species of genus *Desulfuromonas***

**Table S1 Genes uniquely present in strain T3 compared with other species of genus *Desulfuromonas***

| Tag number   | Annotation                                                   |
|--------------|--------------------------------------------------------------|
| DESUT3_01460 | Putative Bsumi Modification Methylase Subunit Ydip           |
| DESUT3_03580 | Hypothetical Protein                                         |
| DESUT3_05490 | Hypothetical Protein                                         |
| DESUT3_07100 | Ai-2E Family Transporter                                     |
| DESUT3_07130 | Hypothetical Protein                                         |
| DESUT3_07210 | Antitoxin Hicb                                               |
| DESUT3_07600 | Hypothetical Protein                                         |
| DESUT3_08270 | Hypothetical Protein                                         |
| DESUT3_12560 | Hypothetical Protein                                         |
| DESUT3_13100 | Hypothetical Protein                                         |
| DESUT3_13900 | Lysr Family Transcriptional Regulator                        |
| DESUT3_13940 | Antitoxin                                                    |
| DESUT3_15240 | Hypothetical Protein                                         |
| DESUT3_15390 | Hypothetical Protein                                         |
| DESUT3_15500 | Cytochrome C                                                 |
| DESUT3_16990 | Hypothetical Protein                                         |
| DESUT3_17150 | Hypothetical Protein                                         |
| DESUT3_17920 | Hypothetical Protein                                         |
| DESUT3_17980 | Hypothetical Protein                                         |
| DESUT3_20410 | Hypothetical Protein                                         |
| DESUT3_20740 | Lipoprotein                                                  |
| DESUT3_20860 | Hypothetical Protein                                         |
| DESUT3_22960 | Hypothetical Protein                                         |
| DESUT3_23860 | Type I Restriction-Modification System Deoxyribonuclease     |
| DESUT3_23880 | Type I Restriction Endonuclease Ecoki Subunit S              |
| DESUT3_26230 | Hypothetical Protein                                         |
| DESUT3_26440 | Hypothetical Protein                                         |
| DESUT3_27260 | Hypothetical Protein                                         |
| DESUT3_28600 | Hypothetical Protein                                         |
| DESUT3_29720 | Glutathione S-Transferase                                    |
| DESUT3_30960 | Hypothetical Protein                                         |
| DESUT3_31320 | Hypothetical Protein                                         |
| DESUT3_33270 | Hypothetical Protein                                         |
| DESUT3_33460 | Flavodoxin Family Protein                                    |
| DESUT3_33690 | Alpha/Beta Hydrolase                                         |
| DESUT3_33960 | Hypothetical Protein                                         |
| DESUT3_34150 | Methyltransferase                                            |
| DESUT3_34460 | Hypothetical Protein                                         |
| DESUT3_34990 | Hypothetical Protein                                         |
| DESUT3_35500 | Molybdopterin-Guanine Dinucleotide Biosynthesis Protein Moba |
| DESUT3_37610 | Hypothetical Protein                                         |
| DESUT3_37660 | Hypothetical Protein                                         |
| DESUT3_37760 | Gdp-L-Fucose Synthase                                        |
| DESUT3_38080 | Two-Component Sensor Histidine Kinase                        |
| DESUT3_38460 | Cytochrome C                                                 |
| DESUT3_40760 | Type Iv Pilin                                                |
| DESUT3_40780 | Hypothetical Protein                                         |
